# Supplementary material for: Long-term observations of black carbon mass concentrations at Fukue Island, western Japan, during 2009–2015: Constraining wet removal rates and emission strengths from East Asia
Source: Copernicus journal article supplement (doi:10.5194/acp-2016-213), 2016-03-18
Supplement: Supplementary file 1 [file acp-2016-213-supplement.pdf]

## Supplementary material

The observed average ratio for area II [N-CEC,  $5.3 \pm 2.1$  ( $1\sigma$ )  $\text{ng m}^{-3} \text{ppb}^{-1}$ ] was smaller than that for area III (S-CEC,  $6.4 \pm 2.2$   $\text{ng m}^{-3} \text{ppb}^{-1}$ ), as discussed in Sect. 3.2.1.2. Figure S1 shows the difference between the frequency distributions of the observed  $\Delta\text{BC}/\Delta\text{CO}$  ratios for the two air mass types (black and red lines). A significant difference between the distributions is observed, particularly for the data with a  $\Delta\text{BC}/\Delta\text{CO}$  ratio smaller than  $4 \text{ ng m}^{-3} \text{ppb}^{-1}$ . The difference was therefore statistically significant ( $p < 0.01$ ) when Welch's t-test was applied to the two data sets. Similarly, the distribution for type V' (Korea only), shown in blue, was different from that for type II, with a statistical significance ( $p < 0.01$ ), mainly because the fraction of data with a  $\Delta\text{BC}/\Delta\text{CO}$  ratio higher than  $8 \text{ ng m}^{-3} \text{ppb}^{-1}$  was larger.

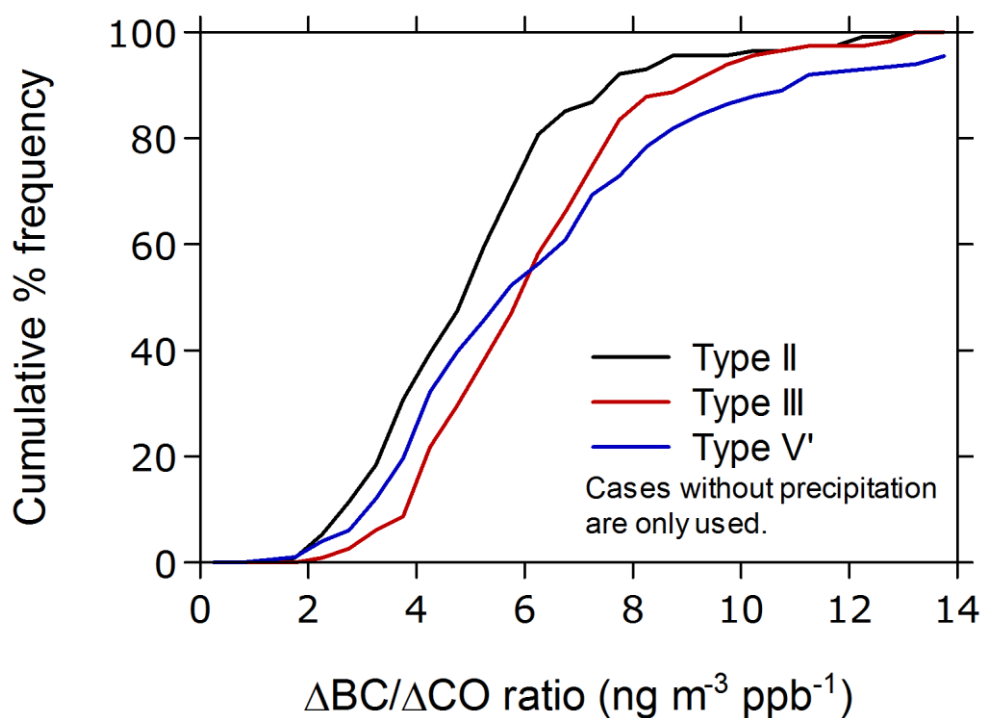

**Figure S1:** Cumulative frequency (%) of observed  $\Delta\text{BC}/\Delta\text{CO}$  ratios for selected air mass types (II, III, and V'). Only cases without precipitation are used.
